# Supplementary material for: A Systematic Review on the Diagnosis of Pediatric Bacterial Pneumonia: When Gold Is Bronze
Source: PLOS journal article supplement (doi:10.1371/journal.pone.0011989), 2010-08-06
Supplement: S2 (10.1371/journal.pone.0011989.s002) [file journal.pone.0011989.s002]

**Table S2: Childhood Bacterial Pneumonia: Participant Characteristics**

| Author; Year                | Total Number of Participants; Enrolled/Analyzed                                                                                                                                    | Age (Mean $\pm$ SD) [Median; Range]; Males: Number (%)                   | Definition of Pneumonia                                          | Inclusion Criteria                                                                                                                                                                                                                     |
|-----------------------------|------------------------------------------------------------------------------------------------------------------------------------------------------------------------------------|--------------------------------------------------------------------------|------------------------------------------------------------------|----------------------------------------------------------------------------------------------------------------------------------------------------------------------------------------------------------------------------------------|
| Bettenay; 1988              | 107 patients reviewed; 58 patients with complete information; formed study group                                                                                                   | NR ; NR                                                                  | Atypical (Mycoplasma) and Typical (Streptococcus)                | Previously healthy children older than 100 days with strong clinical evidence of pneumonia.                                                                                                                                            |
| Blackmore; 1995             | 203 patients admitted; 99 patients entered in study; 46 were children                                                                                                              | Under 16 yrs; Further Information not given for children as a group      | Atypical (Mycoplasma)                                            | Patients admitted to hospital and investigated serologically for M. pneumoniae infection during the study period.                                                                                                                      |
| Castriota-Scanderberg; 1995 | 120 charts reviewed for x-ray and clinical data; 76 children /adolescents charts included; ; M. pneumonia = 38; Viral pneumonia = 22; Bacterial pneumonia = 13; Mixed etiology = 3 | Median: 10.4; SD 1.3; Range: 4.2-16.4 yrs Male: 42 (55.2%)               | Atypical (Mycoplasma)                                            | Children and adolescents with a radiographic diagnosis of pneumonia (showing pulmonary infiltration).                                                                                                                                  |
| Don; 2007                   | 125 evaluated (25 excluded: appropriate serum samples or chest radiograph not available; not diagnosed with pneumonia); 100 included                                               | Median: 3.7 yrs; Male: 49 (49%)                                          | Atypical (Mycoplasma; Chlamydia) and Typical (Streptococcus)     | Previously healthy children; clinical suspicion of pneumonia.                                                                                                                                                                          |
| Esposito; 2002              | Enrolled = 196; Analyzed = 110                                                                                                                                                     | Mean $\pm$ SD: 3.707 $\pm$ 0.870 yrs; Male: 50.5%                        | Typical (Streptococcus) and atypical bacteria alone and combined | Previously healthy children 2-5 yrs of age with signs; symptoms; and chest radiograph findings consistent with community acquired pneumonia.; No concomitant disease; nosocomially acquired infection or antibiotics in past 48 hours. |
| Esteban; 1995               | 87 patients enrolled; ; upper RTI = 19; Laryngitis = 3; Bronchitis = 18; Bronchiolitis = 18; Pneumonia = 29                                                                        | Mean: 2 yrs; Range: 1 month to 14 yrs; Males: 64%                        | Atypical (Mycoplasma)                                            | Diagnosis of acute RTI with no other baseline conditions; diagnosis based on signs and symptoms at entry and chest radiograph.                                                                                                         |
| Gambert; 1993               | M. pneumonia = 19; Other types of pneumonia = 21; NR; NR                                                                                                                           | Median: 6 yrs; Range: 3-12 yrs; Males: 8 (42.1%) those with M. pneumonia | Atypical (Mycoplasma)                                            | Children with a diagnosis of Mycoplasma pneumonia; as diagnosed with the serological criteria.                                                                                                                                         |

|                |                                                                                                                                             |                                                                                                                                                                                                                                                                                                                          |                                                                                             |                                                                                                                                                                                                                             |
|----------------|---------------------------------------------------------------------------------------------------------------------------------------------|--------------------------------------------------------------------------------------------------------------------------------------------------------------------------------------------------------------------------------------------------------------------------------------------------------------------------|---------------------------------------------------------------------------------------------|-----------------------------------------------------------------------------------------------------------------------------------------------------------------------------------------------------------------------------|
| Gendrel; 2002  | Enrolled = 88; Analyzed = 72                                                                                                                | Range: 2 months – 13 yrs; NR                                                                                                                                                                                                                                                                                             | Bacterial pneumonia                                                                         | Children free of chronic disease; and who had not received antibiotics 2 weeks prior to admission.; All patients had fever over 38.5°C; and chest x-ray showing clear signs of pneumonia with alveolar infiltration.        |
| Hardy; 2003    | Enrolled = 154; Underwent both tests = 62                                                                                                   | NR; NR                                                                                                                                                                                                                                                                                                                   | Atypical (Mycoplasma)                                                                       | Immunocompetent children with radiographically-confirmed community acquired pneumonia.                                                                                                                                      |
| Jimenez; 1997  | 56 inpatients enrolled and diagnosed with pneumonia; Viral = 20; Bacterial = 16; Unknown = 20                                               | Mean: 3 yrs; Range: 2 months – 14 yrs; Male: 54%; NR                                                                                                                                                                                                                                                                     | Atypical (Mycoplasma; Chlamydia) and Typical (Streptococcus; H influenzae; M. tuberculosis) | Clinical history.                                                                                                                                                                                                           |
| Liu; 2007      | Available for inclusion = 307; Patients included = 256; Serological tests performed and included = 140                                      | Range: 3 months - 16 yrs (based on 307 available for inclusion); Males: 130 (50.8%) (based on 256 included in study)                                                                                                                                                                                                     | Atypical (Mycoplasma)                                                                       | Hospitalized children with RTI.                                                                                                                                                                                             |
| Mayoral; 2005  | Group A = 24; Group B = 75                                                                                                                  | Range: 3 months – 5 yrs; None reported                                                                                                                                                                                                                                                                                   | Typical (Streptococcus)                                                                     | Pediatric patients 3 months to 5 yrs.; Group A: children with definitive diagnosis of pneumococcal pneumonia confirmed by blood-culture.; Group B: children with clinical and radiological evidence of bacterial pneumonia. |
| Moulin; 2001   | Admitted for community acquired pneumonia = 88; Had no pathogen identified and excluded = 16; Analyzed for bacterial or viral pathogen = 72 | <u>S. Pneumonia (n=10)</u> : Mean 1.9 yrs; Range 0.4-5 yrs; <u>Bacterial Pneumonia (n=15)</u> : Mean 3.9 yrs; Range 0.5-14 yrs; <u>Viral Pneumonia (n=29)</u> : Mean 1.7 yrs; Range 0.5-7 yrs; <u>Viral by Serology (n=8)</u> : Mean 1.3 yrs; Range 0.5-5 yrs; <u>M. Pneumonia (n=10)</u> : Mean 6.2 yrs; Range 3-10 yrs | Atypical (Mycoplasma; Chlamydia)                                                            | Immunocompetent children without chronic disease; pulmonary or otherwise; and who had not received antibiotics in the 10 days before admission.                                                                             |
| Nadal; 1999    | Enrolled = 168; Analyzed as paired sera available = 108                                                                                     | Mean: 4.2 yrs; Range: 0.2-14.9 yrs; None reported                                                                                                                                                                                                                                                                        | Atypical (Mycoplasma)                                                                       | Radiologically confirmed community acquired pneumonia.                                                                                                                                                                      |
| Nagayama; 1988 | Tested 1485 isolates for M. pneumoniae                                                                                                      | Range: 0 – 14 yrs; None reported                                                                                                                                                                                                                                                                                         | Atypical (Mycoplasma)                                                                       | Infants and children <=14 yrs of age with lower RTI manifestations were selected.                                                                                                                                           |

|                |                                                                                                                                                                                            |                                                                                                                                                             |                                                                                                                                                       |                                                                                                                                                                                                                                                                                  |
|----------------|--------------------------------------------------------------------------------------------------------------------------------------------------------------------------------------------|-------------------------------------------------------------------------------------------------------------------------------------------------------------|-------------------------------------------------------------------------------------------------------------------------------------------------------|----------------------------------------------------------------------------------------------------------------------------------------------------------------------------------------------------------------------------------------------------------------------------------|
| Nunes; 2004    | Cases = 45; Controls = 62                                                                                                                                                                  | All Range: 2-12 yrs; <u>Cases</u> : Mean $\pm$ SD: $4.9 \pm 2.9$ yrs Males = 25 (56%) ; <u>Controls</u> : Mean $\pm$ SD: $5.6 \pm 2.5$ yrs Males = 27 (44%) | Detecting the capsular polysaccharide antigens of typical (Streptococcus; H influenzae)                                                               | Patients excluded if they had pleural effusion; pulmonary abscess; concomitant chronic pulmonary diseases or urinary tract infection; and clinical or radiological features suggesting viral and/or atypical pneumonia; such as interstitial and/or reticulonodular infiltrates. |
| Prat; 2003     | Clinically; radiologically; and microbiologically diagnosed with lower RTI = 85; Pneumococcal pneumonia = 31; Atypical pneumonia = 20; Viral pneumonia or bronchiolitis = 34; Control = 38 | Range between 6 months and 10 yrs; NR                                                                                                                       | Typical (Pneumococcal; Streptococcus) and Atypical (Mycoplasma; Chlamydia)                                                                            | Children with clinical signs of lower RTI (fever; difficulty in breathing; or a pneumonic infiltrate in a chest radiograph).                                                                                                                                                     |
| Requejo; 2007  | Children included = 550                                                                                                                                                                    | Not stated; Not stated                                                                                                                                      | Typical (Pneumococcal; Streptococcus)                                                                                                                 | Clinical diagnosis of bacterial pneumonia.                                                                                                                                                                                                                                       |
| Saha; 2006     | Healthy children = 201; Pneumonia = 974; Meningitis = 127                                                                                                                                  | Mean: 9.5 months (pneumonia/ meningitis group)                                                                                                              | Haemophilus influenzae type b                                                                                                                         | Diagnosis of pneumonia was based on World Health Organization definition of acute lower RTI (respiratory rate of at least 50/min for children 2-12 months and 40/min for those aged 12-23 months; and chest indrawings).                                                         |
| Swischuk; 1986 | Enrolled = 110; Excluded due to conflicting concurrent infections and poor clinical documentation = 26; Analyzed = 84                                                                      | Range: 2 months – 15 yrs; “approximately equal”                                                                                                             | Atypical (Mycoplasma)                                                                                                                                 | Roentgenographic evidence of pulmonary infiltrates.                                                                                                                                                                                                                              |
| Toikka; 2000   | Initially enrolled = 254; Included and analyzed based on availability of serum samples = 126                                                                                               | Median: 2.6 yrs; Range: 1 month to 17 yrs; Male: 52%                                                                                                        | Community acquired pneumonia included: Atypical (Mycoplasma; Chlamydia) and Typical (Streptococcus; Moraxella Catarrhalis; H influenzae; S. pyogenes) | Availability of serum samples; signs and symptoms; chest x-rays; not immunocompromised.; Diagnosis of pneumonia based on simultaneous finding of fever and/or respiratory symptoms and infiltrates compatible with pneumonia on chest radiographs.                               |
| Tsai; 2004     | Enrolled with community acquired pneumonia = 209; Chlamydial infection = 26                                                                                                                | Range: 12 months -14 yrs 4 months ; Median: 3.5 yrs; Males: 14 (54%)                                                                                        | Atypical (Chlamydia)                                                                                                                                  | Previously healthy children 3 months to 18 yrs admitted to hospital due to community acquired pneumonia.                                                                                                                                                                         |
| Tzeng; 2005    | Adults and children enrolled = 1334; Children = 91                                                                                                                                         | Pts were <15 yrs of age.; No further demographic info provided                                                                                              | Typical (Streptococcus)                                                                                                                               | Met study criteria for RTI: Fever $>38^{\circ}\text{C}$ ; and one of the following conditions; cough; sore throat; otalgia; radiological signs of pulmonary involvement.                                                                                                         |

|                        |                                                                                                                             |                                                                                      |                                                                                                   |                                                                                                                                                                                                                                                                                            |
|------------------------|-----------------------------------------------------------------------------------------------------------------------------|--------------------------------------------------------------------------------------|---------------------------------------------------------------------------------------------------|--------------------------------------------------------------------------------------------------------------------------------------------------------------------------------------------------------------------------------------------------------------------------------------------|
| Virkki; 2002           | Children enrolled = 296; Children entered in study = 254; Analyzed = 215                                                    | 37 = < 1 year; 71 = 1-2 yrs; 84 = 2-5 yrs; 62 = ≥ 5 yrs; NR; No data                 | Atypical (Mycoplasma; Chlamydia) and Typical (Streptococcus; Moraxella Catarrhalis; H influenzae) | Children with community acquired pneumonia; based on simultaneous finding of an infiltrate on the chest x-ray and fever ≥ 37.5°C and/or respiratory symptoms.                                                                                                                              |
| Vuori-Holopainen; 2002 | 47 asked to participate; 13 refused; Aspiration fluid sample obtained from 26 patients; analyses performed for 34 children. | Based on 34 children with pneumonia; Mean: 5.1 yrs (0.8-14.0 range); Males: 20 (59%) | Typical (Streptococcus)                                                                           | Hospitalized children with pneumonia (respiratory symptoms and signs with a history of fever and consolidation in the chest radiograph at admission); Patients not immunocompromised; postoperative; did not have bleeding diathesis; were not treated in oncology or intensive care unit. |

NR, not reported; RTI, respiratory tract infection; SD, standard deviation; yrs, yrs
