# Supplementary material for: A Systematic Review on the Diagnosis of Pediatric Bacterial Pneumonia: When Gold Is Bronze
Source: PLOS journal article supplement (doi:10.1371/journal.pone.0011989), 2010-08-06
Supplement: S3 (10.1371/journal.pone.0011989.s003) [file journal.pone.0011989.s003]

**Table S3: Criterion Validity for the Diagnosis of Bacterial Pneumonia**

| Author; Year                | Ref. Standard; / Index Test                                                | True Positive | False Negative | False Positive | True Negative | Sensitivity; (95% CI)             | Specificity; (95% CI)             |
|-----------------------------|----------------------------------------------------------------------------|---------------|----------------|----------------|---------------|-----------------------------------|-----------------------------------|
| Bettenay; 1988              | Microbiology / Symptoms & Hematologic                                      | 3             | 8              | 14             | 33            | 27.3% (6.0 – 61.0%) <sup>§</sup>  | 70.2% (55.1 – 82.7%) <sup>§</sup> |
|                             | Microbiology / Chest Radiograph                                            | 6             | 2              | 14             | 24            | 75.0% (34.9 – 96.8%) <sup>§</sup> | 63.2% (46.0 – 78.2%) <sup>§</sup> |
| Blackmore; 1995             | Hematologic / MP-PCR (intermediate combined with negative titer)           | 22            | 1              | 3              | 20            | 95.7% (78.1 – 99.9%) <sup>§</sup> | 87.0% (66.4 – 97.2%) <sup>§</sup> |
| Castrìota-Scanderberg; 1995 | Microbiologic / Bilateral parallel                                         | 10            | 28             | 19             | 19            | 26.3% (13.4 – 43.1%) <sup>§</sup> | 50.0% (34.1 – 65.9%)*             |
|                             | Microbiologic / Lobular or segmented with or without pleural consolidation | 6             | 32;            | 18             | 20            | 15.8% (6.0 – 31.3%) <sup>§</sup>  | 52.6% (36.8 – 68.5%)*             |
|                             | Microbiologic / Unilateral node infiltrate                                 | 22            | 16             | 0              | 38            | 57.9% (42.2 – 73.6%)*             | 100.0% (90.8 – 100%) <sup>§</sup> |
|                             | Microbiologic / Peripheral and diffuse infiltrate                          | 0             | 38             | 1              | 38            | 0% (0 – 9.3%) <sup>§</sup>        | 97.4% (86.5 – 99.9%) <sup>§</sup> |
| Don; 2007                   | <u>S. Pneumoniae</u> :: Radiograph / PCT>0.5 ng/ml                         | 14            | 4              | 15             | 8             | 77.8% (52.4 – 93.6%) <sup>§</sup> | 34.8% (16.4 – 57.3%) <sup>§</sup> |
|                             | <u>S. Pneumoniae</u> :: Radiograph / PCT>1.0 ng/ml                         | 10            | 8              | 9              | 14            | 55.6% (30.8 – 78.5%) <sup>§</sup> | 60.9% (38.5 – 80.3%) <sup>§</sup> |
|                             | <u>S. Pneumoniae</u> :: Radiograph / PCT>2.0 ng/ml                         | 8             | 10             | 6              | 17            | 44.4% (21.5 – 69.2%) <sup>§</sup> | 73.9% (51.6 – 89.8%) <sup>§</sup> |
|                             | <u>M &amp; C. Pneumoniae</u> :: Radiograph / PCT>0.5 ng/ml                 | 18            | 7              | 15             | 8             | 72.0% (50.6 – 87.9%) <sup>§</sup> | 34.8% (16.4 – 57.3%) <sup>§</sup> |
|                             | <u>M &amp; C. Pneumoniae</u> :: Radiograph / PCT>1.0 ng/ml                 | 16            | 9              | 9              | 14            | 64.0% (42.5 – 82.0%) <sup>§</sup> | 60.9% (38.5 – 80.3%) <sup>§</sup> |
|                             | <u>M &amp; C. Pneumoniae</u> :: Radiograph / PCT>0.5 ng/ml                 | 10            | 15             | 6              | 17            | 40.0% (21.1 – 61.3%) <sup>§</sup> | 73.9% (51.6 – 89.8%) <sup>§</sup> |
| Esposito; 2002              | Hematologic & Immunologic / Hyperinflation                                 | 13            | 97             | 11             | 75            | 11.8% (6.5 – 19.4%) <sup>§</sup>  | 87.2% (78.3 – 93.4%) <sup>§</sup> |
|                             | Hematologic & Immunologic / Peribronchial wall thickening                  | 8             | 102            | 7              | 79            | 7.3% (3.2 – 13.8%) <sup>§</sup>   | 91.9% (84.0 – 96.7%) <sup>§</sup> |
|                             | Hematologic & Immunologic / Perihilar linear opacities                     | 44            | 66             | 39             | 47            | 40.0% (30.8 – 49.2%)*             | 54.7% (44.1 – 65.2%)*             |
|                             | Hematologic & Immunologic / Reticulonodular infiltrate                     | 39            | 71             | 31             | 55            | 35.5% (26.5 – 44.4%)*             | 64.0% (53.8 – 74.1%)*             |
|                             | Hematologic & Immunologic / Segmental or lobar consolidation               | 35            | 75             | 27             | 59            | 31.8% (23.1 – 40.5%)*             | 68.6% (58.8 – 78.4%)*             |
|                             | Hematologic & Immunologic / Bilateral consolidations                       | 13            | 97             | 10             | 76            | 11.8% (6.5 – 19.4%) <sup>§</sup>  | 88.4% (79.7 – 94.3%) <sup>§</sup> |

|               |                                              |     |     |    |    |                                   |                                   |
|---------------|----------------------------------------------|-----|-----|----|----|-----------------------------------|-----------------------------------|
|               | Hematologic & Immunologic / Pleural effusion | 7   | 103 | 6  | 80 | 6.4% (2.6 – 12.7%) <sup>§</sup>   | 93.0% (85.4 – 97.4%) <sup>§</sup> |
|               | Hematologic & Immunologic / Cough            | 75  | 35  | 60 | 26 | 68.2% (59.5 – 76.9%)*             | 30.2% (20.5 – 39.9%)*             |
|               | Hematologic & Immunologic / Tachypnea        | 27  | 83  | 21 | 65 | 24.6% (16.5 – 32.6%)*             | 75.6% (66.5 – 84.7%)*             |
|               | Hematologic & Immunologic / Fever ≥ 37.8     | 95  | 15  | 73 | 13 | 86.4% (80.0 – 92.8%)*             | 15.1% (8.3 – 24.5%) <sup>§</sup>  |
|               | Hematologic & Immunologic / Rales            | 101 | 9   | 79 | 7  | 91.8% (85.0 – 96.2%) <sup>§</sup> | 8.1% (3.3 – 16.1%) <sup>§</sup>   |
|               | Hematologic & Immunologic / Wheezing         | 15  | 95  | 11 | 75 | 13.6% (7.3 – 20.1%)*              | 87.2% (78.3 – 93.4%) <sup>§</sup> |
| Esteban; 1995 | Clinical / Microbiologic                     | 16  | 5   | 9  | 12 | 76.2% (52.8 – 91.8%) <sup>§</sup> | 57.1% (34.0 – 78.2%) <sup>§</sup> |
|               | Clinical / Virologic                         | 10  | 19  | 22 | 36 | 34.5% (17.9 – 54.3%) <sup>§</sup> | 62.1% (49.6 – 74.6%)*             |
| Gambert; 1993 | Serology / General Malaise                   | 12  | 7   | 15 | 6  | 63.2% (38.4 - 83.7%) <sup>§</sup> | 28.6% (11.3 – 52.2%) <sup>§</sup> |
|               | Serology/ Abdominal symptoms                 | 9   | 10  | 9  | 12 | 47.4% (24.5 – 71.1%) <sup>§</sup> | 57.1% (34.0 – 78.2%) <sup>§</sup> |
|               | Serology/ Postnasal drip                     | 15  | 4   | 12 | 9  | 79.0% (54.4 – 94.0%) <sup>§</sup> | 42.9% (21.8 – 66.0%) <sup>§</sup> |
|               | Serology / Otitis media                      | 4   | 15  | 4  | 17 | 21.1% (6.1 – 45.6%) <sup>§</sup>  | 81.0% (58.1 – 94.6%) <sup>§</sup> |
|               | Serology / Sinusitis                         | 2   | 17  | 0  | 21 | 10.5% (1.3 – 33.1%) <sup>§</sup>  | 100% (83.9 – 100%) <sup>§</sup>   |
|               | Serology / Tonsillitis                       | 2   | 17  | 3  | 18 | 10.5% (1.3 – 33.1%) <sup>§</sup>  | 85.7% (63.7 – 97.0%) <sup>§</sup> |
|               | Serology /Cutaneous symptoms                 | 5   | 14  | 3  | 18 | 26.3% (9.2 – 51.2%) <sup>§</sup>  | 85.7% (63.7 – 97.0%) <sup>§</sup> |
|               | Serology / Cough                             | 4   | 15  | 2  | 19 | 21.1% (6.1 – 45.6%) <sup>§</sup>  | 90.5% (69.6 – 98.8%) <sup>§</sup> |
|               | Serology / Dyspnea                           | 1   | 18  | 1  | 20 | 5.3% (0.1 – 26.0%) <sup>§</sup>   | 95.2% (76.2 – 99.9%) <sup>§</sup> |
|               | Serology / Thoracic pain                     | 2   | 17  | 2  | 19 | 10.5% (1.3 – 33.1%) <sup>§</sup>  | 90.5% (69.6 – 98.8%) <sup>§</sup> |
|               | Serology / Auscultory signs                  | 17  | 2   | 16 | 5  | 89.5% (66.9 – 98.7%) <sup>§</sup> | 23.8% (8.2 – 47.2%) <sup>§</sup>  |
| Gendrel; 2002 | Microbiologic / PCT > 0.5 ug/L               | 41  | 2   | 10 | 19 | 95.4% (84.2 – 99.4%) <sup>§</sup> | 65.5% (45.7 – 82.1%) <sup>§</sup> |
|               | Microbiologic / PCT >1                       | 37  | 6   | 4  | 25 | 86.1% (72.1 – 94.7%) <sup>§</sup> | 86.2% (68.3 – 96.1%) <sup>§</sup> |
|               | Microbiologic / PCT>2                        | 27  | 16  | 1  | 28 | 62.8% (48.3 – 77.2%) <sup>§</sup> | 96.6% (82.2 – 99.9%) <sup>§</sup> |
|               | Microbiologic / CRP >20 mg/L                 | 38  | 5   | 15 | 14 | 88.4% (74.9 – 96.1%) <sup>§</sup> | 48.3% (29.5 – 67.5%) <sup>§</sup> |
|               | Microbiologic / CRP >60                      | 30  | 13  | 7  | 22 | 69.8% (53.9 – 82.8%) <sup>§</sup> | 75.9% (56.5 – 89.7%) <sup>§</sup> |
|               | Microbiologic / IL6 >100pg/mL                | 12  | 8   | 2  | 10 | 60.0% (36.1 – 80.9%) <sup>§</sup> | 83.3% (51.6 – 97.9%) <sup>§</sup> |
|               | Microbiologic / Leucocytes >15000            | 28  | 15  | 6  | 23 | 65.1% (49.1 – 79.0%) <sup>§</sup> | 79.3% (60.2 – 92.0%) <sup>§</sup> |
|               | Microbiologic / Inf-alpha <2 UI/mL           | 30  | 6   | 4  | 22 | 83.3% (67.2 – 93.6%) <sup>§</sup> | 84.6% (65.1 – 95.6%) <sup>§</sup> |
| Hardy; 2003   | ELISA / Np Op swabs                          | 12  | 9   | 1  | 40 | 57.1% (34.0 – 78.2%) <sup>§</sup> | 97.6% (87.1 – 99.9%) <sup>§</sup> |
| Jimenez; 1997 | Fever / Microbiologic                        | 14  | 37  | 2  | 3  | 27.5% (15.9 – 41.7%) <sup>§</sup> | 60.0% (14.7 – 94.7%) <sup>§</sup> |
|               | Cough / Microbiologic                        | 14  | 39  | 2  | 1  | 26.4% (15.3 – 40.3%) <sup>§</sup> | 33.3% (0.8 – 90.6%) <sup>§</sup>  |
|               | Vomiting / Microbiologic                     | 8   | 28  | 8  | 12 | 22.2% (10.1 – 39.2%) <sup>§</sup> | 60.0% (36.1 – 80.9%) <sup>§</sup> |
|               | Skin Retraction / Microbiologic              | 4   | 16  | 12 | 24 | 20.0% (5.7 – 43.7%) <sup>§</sup>  | 66.7% (49.0 – 81.4%) <sup>§</sup> |

|                |                                                 |    |     |    |    |                                   |                                   |
|----------------|-------------------------------------------------|----|-----|----|----|-----------------------------------|-----------------------------------|
|                | Tachypnea / Microbiologic                       | 2  | 23  | 14 | 17 | 8.0% (1.0 – 26.0%) <sup>§</sup>   | 54.8% (36.0 – 72.7%) <sup>§</sup> |
|                | Wheezing / Microbiologic                        | 3  | 17  | 13 | 23 | 15.0% (3.2 – 37.9%) <sup>§</sup>  | 63.9% (46.2 – 79.2%) <sup>§</sup> |
|                | Crackles / Microbiologic                        | 11 | 35  | 5  | 5  | 23.9% (12.6 – 38.8%) <sup>§</sup> | 50.0% (18.7 – 81.3%) <sup>§</sup> |
|                | Rash / Microbiologic                            | 0  | 5   | 16 | 35 | 0.0% (0.0 – 52.2%) <sup>§</sup>   | 68.6% (55.9 – 81.4%)*             |
|                | Running Nose / Microbiologic                    | 6  | 16  | 10 | 24 | 27.3% (10.7 – 50.2%) <sup>§</sup> | 70.6% (52.5 – 84.9%) <sup>§</sup> |
|                | Local Condensation / Microbiologic              | 10 | 23  | 6  | 17 | 30.3% (15.6 – 48.7%) <sup>§</sup> | 73.9% (51.6 – 89.8%) <sup>§</sup> |
|                | Diffuse Condensation / Microbiologic            | 6  | 18  | 10 | 22 | 25.0% (9.8 – 46.7%) <sup>§</sup>  | 68.8% (50.0 – 83.9%) <sup>§</sup> |
|                | Trappings / Microbiologic                       | 1  | 6   | 15 | 34 | 14.3% (0.4 – 57.9%) <sup>§</sup>  | 69.4% (54.6 – 81.8%) <sup>§</sup> |
|                | Hilar Reinforcement / Microbiologic             | 3  | 16  | 13 | 24 | 15.8% (3.4 – 39.6%) <sup>§</sup>  | 64.9% (47.5 – 79.8%) <sup>§</sup> |
|                | Segmented / Microbiologic                       | 11 | 23  | 5  | 17 | 32.4% (17.4 – 50.5%) <sup>§</sup> | 77.3% (54.6 – 92.2%) <sup>§</sup> |
|                | Lymphocytes / Microbiologic                     | 4  | 12  | 12 | 28 | 25.0% (7.3 – 52.4%) <sup>§</sup>  | 70.0% (53.5 – 83.4%) <sup>§</sup> |
|                | Monocytes / Microbiologic                       | 1  | 3   | 15 | 37 | 25.0% (0.6 – 80.6%) <sup>§</sup>  | 71.2% (58.8 – 83.5%)*             |
| Liu; 2007      | Immunologic / PCR;                              | 51 | 25  | 13 | 51 | 67.1% (56.6 – 77.7%)*             | 79.7% (67.8 – 88.7%) <sup>§</sup> |
| Mayoral; 2005  | Group A / Nested PCR                            | 20 | 4   | 0  | 20 | 83.3% (62.6 – 95.3%) <sup>§</sup> | 100% (83.2 – 100%) <sup>§</sup>   |
|                | Group B / Nested PCR                            | 53 | 22  | 0  | 20 | 70.7% (60.4 – 81.0%)*             | 100% (83.2 – 100%) <sup>§</sup>   |
| Moulin; 2001   | Serological / PCT > 0.5 µg/l                    | 41 | 2   | 10 | 19 | 95.4% (84.2 – 99.4%) <sup>§</sup> | 65.5% (45.7 – 82.1%) <sup>§</sup> |
|                | Serological / PCT > 1.0 µg/l                    | 37 | 6   | 4  | 25 | 86.1% (72.1 – 94.7%) <sup>§</sup> | 86.2% (68.3 – 96.1%) <sup>§</sup> |
|                | Serological / PCT > 2.0 µg/l                    | 27 | 16  | 1  | 28 | 62.8% (48.3 – 77.2%)*             | 96.6% (82.2 – 99.9%) <sup>§</sup> |
|                | Serological / CRP > 20 mg/l                     | 38 | 5   | 15 | 14 | 88.4% (74.9 – 96.1%) <sup>§</sup> | 48.3% (29.5 – 67.5%) <sup>§</sup> |
|                | Serological / CRP > 60 mg/l                     | 30 | 13  | 7  | 22 | 69.8% (53.9 – 82.8%) <sup>§</sup> | 75.9% (56.5 – 89.7%) <sup>§</sup> |
|                | Serological / IL-6 > 100 pg/ml                  | 12 | 8   | 2  | 10 | 60.0% (36.1 – 80.9%) <sup>§</sup> | 83.3% (51.6 – 97.9%) <sup>§</sup> |
|                | Serological / WBC >15;000 (x10 <sup>6</sup> /l) | 28 | 15  | 6  | 23 | 65.1% (49.1 – 79.0%) <sup>§</sup> | 79.3% (60.3 – 92.0%) <sup>§</sup> |
| Nadal; 1999    | CF / PCR                                        | 8  | 14  | 3  | 83 | 36.4% (17.2 – 59.3%) <sup>§</sup> | 96.5% (90.1 – 99.3%) <sup>§</sup> |
|                | ELISA / PCR                                     | 7  | 6   | 4  | 91 | 54.9% (25.1 – 80.8%) <sup>§</sup> | 95.8% (89.6 – 98.8%) <sup>§</sup> |
| Nagayama; 1988 | Microbiology / IHA <40                          | 85 | 135 | 18 | 96 | 38.6% (32.2 – 45.1%)*             | 84.2% (77.5 – 90.9%)*             |
|                | Microbiology / IHA ≥640                         | 83 | 137 | 68 | 46 | 37.7% (31.3 – 44.1%)*             | 40.4% (31.3 – 49.4%)*             |
|                | Microbiology / CF titer <4                      | 38 | 91  | 15 | 66 | 29.5% (21.6 – 37.3%)*             | 81.5% (73.0 – 89.9%)*             |
|                | Microbiology / CF titer ≥64                     | 49 | 80  | 45 | 36 | 38.0% (29.6 – 46.4%)*             | 44.4% (33.6 – 55.3%)*             |
| Nunes; 2004    | Reference Diagnosis / LPAT                      | 34 | 10  | 6  | 56 | 77.3% (62.2 – 88.5%) <sup>§</sup> | 90.3% (80.1 – 96.4%) <sup>§</sup> |

|                |                                                                 |     |    |     |     |                                   |                                   |
|----------------|-----------------------------------------------------------------|-----|----|-----|-----|-----------------------------------|-----------------------------------|
| Prat; 2003     | 1) Microbiologic / PCT at cutoff of 2 ng/ml                     | 35  | 16 | 7   | 27  | 68.6% (56.0 – 81.4%)*             | 79.4% (62.1 – 91.3%) <sup>§</sup> |
|                | 2) Microbiologic / CRP at cutoff of 65 mg/l                     | 40  | 11 | 11  | 23  | 78.4% (64.7 – 88.7%) <sup>§</sup> | 67.7% (49.5 – 82.6%) <sup>§</sup> |
| Requejo; 2007  | Microbiologic / CIE (pleural fluid)                             | 146 | 0  | 52  | 352 | 100% (97.5 - 100%) <sup>§</sup>   | 87.1% (83.9 – 90.4%) <sup>+</sup> |
|                | Microbiologic / LA (pleural fluid)                              | 146 | 0  | 130 | 274 | 100% (97.5 - 100%) <sup>§</sup>   | 67.8% (63.3 – 72.4%) <sup>+</sup> |
|                | Microbiologic / ELISA (pleural fluid)                           | 146 | 0  | 204 | 200 | 100% (97.5 - 100%) <sup>§</sup>   | 49.5% (44.6 – 54.4%) <sup>+</sup> |
|                | Microbiologic / CIE (serum)                                     | 133 | 13 | 0   | 404 | 91.1% (85.3 – 95.2%) <sup>§</sup> | 100% (99.1 - 100%) <sup>§</sup>   |
|                | Microbiologic / LA (serum)                                      | 146 | 0  | 64  | 340 | 100% (97.5 - 100%) <sup>§</sup>   | 84.2% (80.6 – 87.7%) <sup>+</sup> |
|                | Microbiologic / ELISA (serum)                                   | 146 | 0  | 176 | 228 | 100% (97.5 - 100%) <sup>§</sup>   | 56.4% (51.6 – 61.3%) <sup>+</sup> |
|                | Microbiologic / CIE (urine)                                     | 146 | 0  | 57  | 347 | 100% (97.5 - 100%) <sup>§</sup>   | 85.9% (82.5 – 89.3%) <sup>+</sup> |
|                | Microbiologic / LA (urine)                                      | 146 | 0  | 114 | 290 | 100% (97.5 - 100%) <sup>§</sup>   | 71.8% (67.4 – 76.2%) <sup>+</sup> |
|                | Microbiologic / ELISA (urine)                                   | 146 | 0  | 173 | 231 | 100% (97.5 - 100%) <sup>§</sup>   | 57.2% (52.4 – 62.0%) <sup>+</sup> |
| Saha; 2006     | Blood Culture / LAT                                             | 10  | 0  | 2   | 117 | 100% (69.2 - 100%) <sup>§</sup>   | 98.3% (94.1 – 99.8%) <sup>§</sup> |
| Swischuk; 1986 | Clinical diagnosis / Chest radiograph                           | 16  | 7  | 2   | 49  | 69.6% (47.1 – 86.8%) <sup>§</sup> | 96.1% (86.5 – 99.5%) <sup>§</sup> |
| Toikka ; 2000  | Immunologic / CRP cutoff 80 mg/l                                | 40  | 28 | 13  | 27  | 58.8% (47.1 – 70.5%) <sup>+</sup> | 67.5% (50.9 – 81.4%) <sup>§</sup> |
|                | Immunologic / CRP cutoff of 150 mg/l                            | 21  | 47 | 5   | 35  | 30.9% (19.9 – 41.9%) <sup>+</sup> | 87.5% (73.2 – 95.8%) <sup>§</sup> |
|                | Immunologic / PCT cutoff 2.0 ng/ml                              | 34  | 34 | 8   | 32  | 50.0% (38.1 – 61.9%) <sup>+</sup> | 80.0% (64.4 – 91.0%) <sup>§</sup> |
|                | Immunologic / PCT cutoff 7.0 ng/ml                              | 13  | 55 | 1   | 39  | 19.1% (10.6 – 30.5%) <sup>§</sup> | 97.5% (86.8 – 99.9%) <sup>§</sup> |
|                | Immunologic / IL-6 cutoff 40 pg/ml                              | 23  | 45 | 7   | 33  | 33.8% (22.6 – 45.1%) <sup>+</sup> | 82.5% (67.2 – 92.7%) <sup>§</sup> |
|                | Immunologic / IL-6 cutoff 100 pg/ml                             | 12  | 56 | 1   | 39  | 17.7% (9.5 – 28.8%) <sup>§</sup>  | 97.5% (86.8 – 99.9%) <sup>§</sup> |
| Tsai; 2004     | Microbiologic / Fever                                           | 5   | 0  | 0   | 21  | 100% (47.8 - 100%) <sup>§</sup>   | 100% (83.9 - 100%) <sup>§</sup>   |
|                | Microbiologic / Cough                                           | 5   | 0  | 0   | 21  | 100% (47.8 - 100%) <sup>§</sup>   | 100% (83.9 - 100%) <sup>§</sup>   |
|                | Microbiologic / Rhinorrhea                                      | 3   | 2  | 13  | 8   | 60.0% (14.7 – 94.7%) <sup>§</sup> | 38.1% (18.1 – 61.6%) <sup>§</sup> |
|                | Microbiologic / Tachypnea                                       | 0   | 5  | 4   | 17  | 0.0% (0.0 – 52.2%) <sup>§</sup>   | 81.0% (58.1 – 94.6%) <sup>§</sup> |
|                | Microbiologic / Wheeze                                          | 0   | 5  | 2   | 19  | 0.0% (0.0 – 52.2%) <sup>§</sup>   | 90.5% (69.6 – 98.8%) <sup>§</sup> |
|                | Microbiologic / Rales                                           | 3   | 2  | 12  | 9   | 60.0% (14.7 – 94.7%) <sup>§</sup> | 42.9% (21.8 – 66.0%) <sup>§</sup> |
|                | Microbiologic / Rhonchi                                         | 1   | 4  | 6   | 15  | 20.0% (0.5 – 71.6%) <sup>§</sup>  | 71.4% (47.8 – 88.7%) <sup>§</sup> |
|                | Microbiologic / Vomiting                                        | 1   | 4  | 3   | 18  | 20.0% (0.5 – 71.6%) <sup>§</sup>  | 85.7% (63.7 – 97.0%) <sup>§</sup> |
|                | Microbiologic / Abdominal pain                                  | 0   | 5  | 1   | 20  | 0.0% (0.0 – 52.2%) <sup>§</sup>   | 95.2% (76.2 – 99.9%) <sup>§</sup> |
|                | Microbiologic / Leukocyte count (/mm <sup>3</sup> ) <5000       | 1   | 4  | 3   | 18  | 20.0% (0.5 – 71.6%) <sup>§</sup>  | 85.7% (63.7 – 97.0%) <sup>§</sup> |
|                | Microbiologic / Leukocyte count (/mm <sup>3</sup> ) 5000-15,000 | 3   | 2  | 11  | 10  | 60.0% (14.7 – 94.7%) <sup>§</sup> | 47.6% (25.7 – 70.2%) <sup>§</sup> |

|                        |                                                                         |    |     |    |    |                                   |                                   |
|------------------------|-------------------------------------------------------------------------|----|-----|----|----|-----------------------------------|-----------------------------------|
|                        | Microbiologic / Leukocyte count (/mm <sup>3</sup> ) >15;000             | 1  | 4   | 7  | 14 | 20.0% (0.5 – 71.6%) <sup>§</sup>  | 66.7% (43.0 – 85.4%) <sup>§</sup> |
|                        | Microbiologic / Platelet count (10 <sup>3</sup> /mm <sup>3</sup> ) ≥100 | 0  | 5   | 20 | 1  | 0.0% (0.0 – 52.2%) <sup>§</sup>   | 4.8% (0.1 – 23.8%) <sup>§</sup>   |
|                        | Microbiologic / CRP (mg/L) <10                                          | 2  | 3   | 1  | 20 | 40.0% (5.3 – 85.3%) <sup>§</sup>  | 95.2% (76.2 – 99.9%) <sup>§</sup> |
|                        | Microbiologic / CRP (mg/L) 10-40                                        | 0  | 5   | 5  | 16 | 0.0% (0.0 – 52.2%) <sup>§</sup>   | 76.2% (52.8 – 91.8%) <sup>§</sup> |
|                        | Microbiologic / CRP (mg/L) >40                                          | 3  | 2   | 15 | 6  | 60.0% (14.7 – 94.7%) <sup>§</sup> | 28.6% (11.3 – 52.2%) <sup>§</sup> |
| Tzeng; 2005            | Microbiologic / ICT                                                     | 10 | 1   | 25 | 55 | 90.9% (58.7 - 99.8%) <sup>§</sup> | 68.8% (58.6 – 78.9%)*             |
| Virkki; 2002           | Radiograph / WBC >15.0 x 10 <sup>9</sup> /l                             | 64 | 70  | 38 | 43 | 47.8% (39.3 – 56.2%) <sup>*</sup> | 53.1% (42.2 – 64.0%) <sup>*</sup> |
|                        | Radiograph / ESR >30 mm/h                                               | 88 | 46  | 49 | 32 | 65.7% (57.6 – 73.7%) <sup>*</sup> | 39.5% (28.9 – 50.2%) <sup>*</sup> |
|                        | Radiograph / CRP <20 mg/l                                               | 30 | 104 | 27 | 54 | 22.4% (15.3 – 29.5%) <sup>*</sup> | 66.7% (56.4 – 76.9%) <sup>*</sup> |
|                        | Radiograph / CRP >40 mg/l                                               | 89 | 45  | 38 | 43 | 66.4% (58.4 – 74.4%) <sup>*</sup> | 53.1% (42.2 – 64.0%) <sup>*</sup> |
|                        | Radiograph / CRP >80 mg/l                                               | 70 | 64  | 23 | 58 | 52.2% (43.8 – 60.7%) <sup>*</sup> | 71.6% (61.8 – 81.4%) <sup>*</sup> |
|                        | Radiograph / CRP >120 mg/l                                              | 48 | 86  | 12 | 69 | 35.8% (27.7 – 43.9%) <sup>*</sup> | 85.2% (75.6 – 92.1%) <sup>§</sup> |
| Vuori-Holopainen; 2002 | Blood culture / Lung aspirate                                           | 1  | 9   | 1  | 9  | 10.0% (0.3 – 44.5%) <sup>§</sup>  | 90.0% (55.6 – 99.8%) <sup>§</sup> |
|                        | PCR / Lung aspirate                                                     | 8  | 1   | 8  | 2  | 88.9% (51.8 – 99.7%) <sup>§</sup> | 20.0% (2.5 – 55.6%) <sup>§</sup>  |
|                        | RNA-hyb / Lung aspirate                                                 | 10 | 0   | 0  | 8  | 100.0% (69.2 – 100%) <sup>§</sup> | 100.0% (63.1 - 100%) <sup>§</sup> |

\*normal approximation used to calculate 95% confidence intervals; <sup>§</sup>binomial exact method used to calculate 95% confidence interval
