# Supplementary material for: A Systematic Review on the Diagnosis of Pediatric Bacterial Pneumonia: When Gold Is Bronze
Source: PLOS journal article supplement (doi:10.1371/journal.pone.0011989), 2010-08-06
Supplement: S4 (10.1371/journal.pone.0011989.s004) [file journal.pone.0011989.s004]

**Table S4: Childhood Bacterial Pneumonia: Quality Assessment of Studies of Diagnostic Accuracy included in Systematic Reviews (QUADAS)**

| Author; Year                | QUADAS Question (see legend for each question) |         |     |         |     |     |     |         |         |         |         |     |         |         | Total |
|-----------------------------|------------------------------------------------|---------|-----|---------|-----|-----|-----|---------|---------|---------|---------|-----|---------|---------|-------|
|                             | 1                                              | 2       | 3   | 4       | 5   | 6   | 7   | 8       | 9       | 10      | 11      | 12  | 13      | 14      |       |
| Bettenay; 1988              | Unclear                                        | Unclear | Yes | Unclear | Yes | Yes | Yes | Yes     | Yes     | Unclear | Unclear | Yes | Yes     | Yes     | 9     |
| Blackmore; 1995             | Unclear                                        | Yes     | Yes | Unclear | Yes | Yes | Yes | Yes     | Yes     | Unclear | Yes     | Yes | Yes     | Yes     | 11    |
| Castriota-Scanderberg; 1995 | Unclear                                        | Yes     | Yes | Unclear | Yes | Yes | Yes | Yes     | Yes     | Unclear | Unclear | Yes | Yes     | Yes     | 10    |
| Don; 2007                   | Yes                                            | Yes     | Yes | Yes     | Yes | Yes | Yes | Yes     | Yes     | Yes     | Yes     | Yes | Yes     | Yes     | 14    |
| Esposito; 2002              | Unclear                                        | Yes     | Yes | Unclear | Yes | Yes | Yes | Yes     | Yes     | Yes     | Yes     | Yes | Yes     | Yes     | 12    |
| Esteban; 1995               | Yes                                            | Yes     | Yes | Unclear | Yes | Yes | Yes | Yes     | Yes     | Unclear | Unclear | Yes | Unclear | Yes     | 10    |
| Gambert; 1993               | Yes                                            | Yes     | Yes | Unclear | Yes | Yes | Yes | Yes     | Yes     | Unclear | Unclear | Yes | Unclear | Yes     | 10    |
| Gendrel; 2002               | Unclear                                        | Yes     | Yes | Yes     | Yes | Yes | Yes | Yes     | Yes     | Unclear | Unclear | Yes | Unclear | Unclear | 9     |
| Hardy; 2003                 | Unclear                                        | Yes     | Yes | Unclear | Yes | Yes | Yes | Yes     | Yes     | Unclear | Unclear | Yes | Unclear | Yes     | 9     |
| Jimenez; 1997               | Yes                                            | Unclear | Yes | Unclear | Yes | Yes | Yes | Yes     | Yes     | Unclear | Unclear | Yes | Unclear | Yes     | 9     |
| Liu; 2007                   | Unclear                                        | Yes     | Yes | Yes     | Yes | Yes | Yes | Yes     | Yes     | Unclear | Unclear | Yes | Yes     | Yes     | 11    |
| Mayoral; 2005               | Unclear                                        | Yes     | Yes | Yes     | Yes | Yes | Yes | Yes     | Yes     | Unclear | Unclear | Yes | Unclear | Yes     | 10    |
| Moulin; 2001                | Unclear                                        | Yes     | Yes | Yes     | Yes | Yes | Yes | Yes     | Yes     | Unclear | Yes     | Yes | Yes     | Yes     | 12    |
| Nadal; 1999                 | Unclear                                        | Yes     | Yes | Yes     | Yes | Yes | Yes | Yes     | Unclear | Unclear | Unclear | Yes | Yes     | Yes     | 10    |
| Nagayama; 1988              | Unclear                                        | Yes     | Yes | Unclear | Yes | Yes | Yes | Yes     | Yes     | Unclear | Unclear | Yes | Yes     | Yes     | 10    |
| Nunes; 2004                 | Unclear                                        | Yes     | Yes | Yes     | Yes | Yes | Yes | Yes     | Yes     | Yes     | Yes     | Yes | Yes     | Yes     | 13    |
| Prat; 2003                  | Unclear                                        | Yes     | Yes | Yes     | Yes | Yes | Yes | Yes     | Yes     | Unclear | Unclear | Yes | Unclear | Yes     | 10    |
| Requejo; 2007               | Unclear                                        | Unclear | Yes | Unclear | Yes | Yes | Yes | Yes     | Yes     | Unclear | Unclear | Yes | Unclear | Yes     | 8     |
| Saha; 2006                  | Unclear                                        | Yes     | Yes | Unclear | Yes | Yes | Yes | Yes     | Yes     | Unclear | Unclear | Yes | Yes     | Unclear | 9     |
| Swischuk; 1986              | Yes                                            | Yes     | Yes | Unclear | Yes | Yes | Yes | Yes     | Yes     | Unclear | Unclear | Yes | Yes     | Yes     | 11    |
| Toikka; 2000                | Unclear                                        | Yes     | Yes | Yes     | Yes | Yes | Yes | Yes     | Yes     | Yes     | Yes     | Yes | Yes     | Yes     | 13    |
| Tsai; 2004                  | Yes                                            | Yes     | Yes | Unclear | Yes | Yes | Yes | Unclear | Yes     | Unclear | Unclear | Yes | Yes     | Yes     | 10    |
| Tzeng; 2005                 | Unclear                                        | Yes     | Yes | Unclear | Yes | Yes | Yes | Yes     | Yes     | Unclear | Unclear | Yes | Yes     | Yes     | 10    |
| Virkki; 2002                | Unclear                                        | Yes     | Yes | Unclear | Yes | Yes | Yes | Yes     | Yes     | Yes     | Unclear | Yes | Unclear | Yes     | 10    |
| Vuori-Holopainen; 2002      | Unclear                                        | Yes     | Yes | Yes     | Yes | Yes | Yes | Yes     | Yes     | Unclear | Unclear | Yes | Yes     | Yes     | 11    |

Questions: (1) Was the spectrum of patients representative of the patients who will receive the test in practice?; (2) Were selection criteria clearly described?; (3) Is the reference standard likely to correctly classify the target condition?; (4) Is the time period between reference standard and index test short enough to be reasonably sure that the target condition did not change between the two tests?; (5) Did the whole sample or a random selection of the sample, receive verification using a reference standard of diagnosis?; (6) Did patients receive the same reference standard regardless of the index test result?; (7) Was the reference standard independent of the index test (i.e. the index test did not form part of the reference standard)?; (8) Was the execution of the index test described in sufficient detail to permit replication of the test?; (9) Was the execution of the reference standard described in sufficient detail to permit its replication?; (10) Were the index test results interpreted without knowledge of the results of the reference standard?; (11) Were the reference standard results interpreted without knowledge of the results of the index test?; (12) Were the same clinical data available when test results were interpreted as would be available when the test is used in practice?; (13) Were uninterruptable/intermediate test results reported?; (14) Were withdrawals from the study explained?
